# Supplementary material for: Adsorption of tetrakis(4-sulfophenyl)porphyrin onto liposomal surfaces composed of neutral diacylphosphatidylcholine and release by cyclodextrin
Source: Royal Society of Chemistry journal article supplement (doi:10.1039/c8ra01411f), 2018-01-01
Supplement: c8ra01411f1.pdf [file c8ra01411f1.pdf]

## **Electronic Supplementary Information**

### **Adsorption of tetrakis(4-sulfophenyl)porphyrin onto liposomal surfaces composed of neutral diacylphosphatidylcholine and release by cyclodextrin**

Yuki Tsuchiya, Toshimi Nakaya, Tomoyuki Kakigi, Kouta Sugikawa and  
Atsushi Ikeda

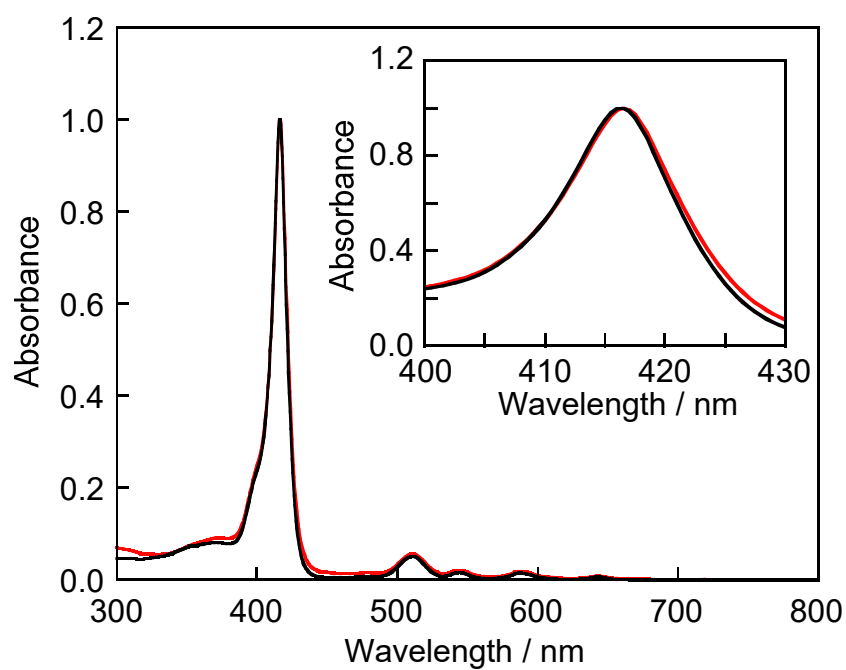

**Fig. S1** UV-vis absorption spectra of the **4•TMe-β-CDx** complex in the absence (black) and in the presence (red) of liposome-1 at 25 °C. The inset shows the region of 400–430 nm.

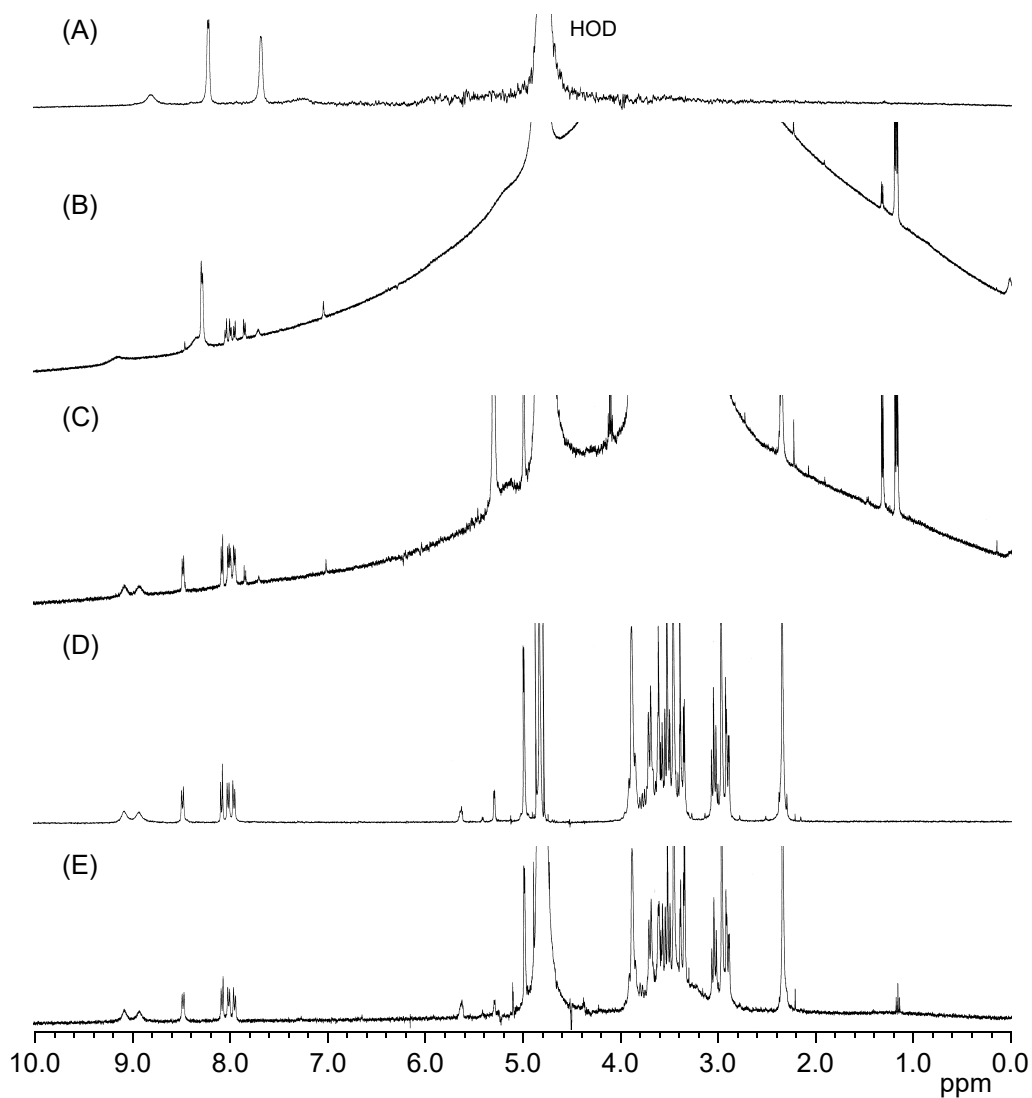

**Fig. S2** Complete  $^1\text{H}$  NMR spectra of (A) **3** ( $[\mathbf{3}] = 0.4$  mM), (B) the mixture of **3** and liposome-**1** ( $[\mathbf{3}] = 0.05$  mM and  $[\mathbf{1}] = 25$  mM), (C) the mixture of **3**, liposome-**1** and TMe- $\beta$ -CDx ( $[\mathbf{3}] = 0.05$  mM,  $[\mathbf{1}] = 25$  mM and  $[\text{TMe-}\beta\text{-CDx}] = 1.0$  mM), (D) the **3**•TMe- $\beta$ -CDx complex ( $[\mathbf{3}\cdot\text{TMe-}\beta\text{-CDx complex}] = 0.40$  mM) and (E) the mixture of the **3**•TMe- $\beta$ -CDx complex and liposome-**1** ( $[\mathbf{3}\cdot\text{TMe-}\beta\text{-CDx complex}] = 0.20$  mM and  $[\mathbf{1}] = 4.0$  mM) in the  $\text{D}_2\text{O}$ -phosphate buffer (pH = 6.8).
